# Supplementary material
Source: MDPI journal article supplement (https://www.mdpi.com/2673-5601/1/4/37)
Supplement: s1 [file s1]

**Supplementary Table 5: Environmental characteristics (Temperature, rainfall, humidity, ozone levels, UV exposition, pollutants) according to geographical location.**

| Characteristic                                     | N  | N, N = 8 <sup>1</sup> | S, N = 7 <sup>1</sup> | p-value <sup>2</sup> |
|----------------------------------------------------|----|-----------------------|-----------------------|----------------------|
| Mean temperature (°C)                              | 15 | 10.90 (0.88)          | 15.45 (1.79)          | <0.001               |
| MD                                                 |    | 0                     | 0                     |                      |
| Mean minimal temperature (°C)                      | 15 | 7.26 (1.34)           | 11.19 (1.96)          | 0.001                |
| MD                                                 |    | 0                     | 0                     |                      |
| Mean maximal temperature (°C)                      | 15 | 14.47 (1.00)          | 19.83 (2.08)          | <0.001               |
| MD                                                 |    | 0                     | 0                     |                      |
| Precipitations (mm)                                | 15 | 72 (23)               | 69 (30)               | 0.5                  |
| MD                                                 |    | 0                     | 0                     |                      |
| Humidity (%)                                       | 15 | 75 (3)                | 69 (9)                | 0.3                  |
| MD                                                 |    | 0                     | 0                     |                      |
| Number of rainy per month (day)                    | 15 | 8.73 (1.29)           | 6.14 (2.01)           | 0.017                |
| MD                                                 |    | 0                     | 0                     |                      |
| Hours of sun per month (hours)                     | 15 | 6.95 (0.80)           | 8.48 (0.90)           | 0.009                |
| MD                                                 |    | 0                     | 0                     |                      |
| Mean Ozone levels per years<br>(From 2013 to 2019) | 13 | 52 (10)               | 53 (12)               | 0.8                  |
| MD                                                 |    | 2                     | 0                     |                      |
| PM10 levels per years (From<br>2013 to 2019)       | 15 | 20.5 (3.2)            | 24.6 (5.9)            | 0.12                 |
| MD                                                 |    | 0                     | 0                     |                      |
| PM2.5 levels per years (From<br>2013 to 2019)      | 15 | 14.1 (2.5)            | 15.3 (6.8)            | 0.7                  |
| MD                                                 |    | 0                     | 0                     |                      |

MD, Missing data

<sup>1</sup> Mean (SD); n / N (%)

<sup>2</sup> Wilcoxon rank sum test; Fisher's exact test; Pearson's Chi-squared test

---
