# Supplementary material
Source: MDPI journal article supplement (https://www.mdpi.com/2673-5601/1/4/37)
Supplement: s1 [file s1]

**Supplementary Table 1: Characteristics of patients with primary Sjögren's syndrome (pSS), systemic lupus erythematosus (SLE), systemic sclerosis (SSc), rheumatoid arthritis (RA).**

| <b>Characteristics of pSS patients</b> | <b>N</b> | <b>South<br/>N = 111<sup>1</sup></b> | <b>North<br/>N = 108<sup>1</sup></b> | <b>p-value<sup>2</sup></b> |
|----------------------------------------|----------|--------------------------------------|--------------------------------------|----------------------------|
| Age                                    | 219      | 59 (11)                              | 58 (13)                              | 0.6                        |
| MD                                     |          | 0                                    | 0                                    |                            |
| Gender                                 | 219      |                                      |                                      | 0.5                        |
| Female                                 |          | 108 / 111 (97%)                      | 103 / 108 (95%)                      |                            |
| Male                                   |          | 3 / 111 (2.7%)                       | 5 / 108 (4.6%)                       |                            |
| MD                                     |          | 0                                    | 0                                    |                            |
| Ethnic origin                          | 219      |                                      |                                      | 0.2                        |
| Asian                                  |          | 0 / 111 (0%)                         | 1 / 108 (0.9%)                       |                            |
| Caucasian/White                        |          | 111 / 111 (100%)                     | 106 / 108 (98%)                      |                            |
| Other                                  |          | 0 / 111 (0%)                         | 1 / 108 (0.9%)                       |                            |
| MD                                     |          | 0                                    | 0                                    |                            |
| Obesity                                | 208      | 13 / 102 (13%)                       | 17 / 106 (16%)                       | 0.5                        |
| MD                                     |          | 9                                    | 2                                    |                            |
| Cigarette smoking                      | 203      | 9 / 101 (8.9%)                       | 10 / 102 (9.8%)                      | 0.8                        |
| MD                                     |          | 10                                   | 6                                    |                            |
| Duration disease                       | 219      | 11 (7)                               | 10 (7)                               | 0.2                        |
| MD                                     |          | 0                                    | 0                                    |                            |
| Physician global assessment            | 212      | 19 (17)                              | 28 (18)                              | <0.001                     |
| MD                                     |          | 0                                    | 7                                    |                            |
| Treatment                              |          |                                      |                                      |                            |
| Antimalarial                           | 219      | 34 / 111 (31%)                       | 41 / 108 (38%)                       | 0.3                        |
| MD                                     |          | 0                                    | 0                                    |                            |
| Immunosuppressors                      | 219      | 13 / 111 (12%)                       | 21 / 108 (19%)                       | 0.11                       |
| MD                                     |          | 0                                    | 0                                    |                            |
| Steroids                               | 219      | 13 / 111 (12%)                       | 27 / 108 (25%)                       | 0.011                      |
| MD                                     |          | 0                                    | 0                                    |                            |
| Anti TNF                               | 219      | 0 / 111 (0%)                         | 0 / 108 (0%)                         |                            |
| MD                                     |          | 0                                    | 0                                    |                            |
| Tocilizumab                            | 0        | NA (NA)                              | NA (NA)                              |                            |
| MD                                     |          | 111                                  | 108                                  |                            |
| Abatacept                              | 0        | NA (NA)                              | NA (NA)                              |                            |
| MD                                     |          | 111                                  | 108                                  |                            |

MD, Missing data

<sup>1</sup> Mean (SD); n / N (%)

<sup>2</sup> Wilcoxon rank sum test; Fisher's exact test; Pearson's Chi-squared test

| <b>Characteristics of SLE patients</b> | <b>N</b> | <b>South<br/>N = 149<sup>1</sup></b> | <b>North<br/>N = 155<sup>1</sup></b> | <b>p-value<sup>2</sup></b> |
|----------------------------------------|----------|--------------------------------------|--------------------------------------|----------------------------|
| Age                                    | 304      | 47 (13)                              | 45 (15)                              | 0.14                       |

|                                |                        |                 |                 |                 |        |
|--------------------------------|------------------------|-----------------|-----------------|-----------------|--------|
|                                | MD                     | 0               | 0               |                 |        |
| Gender                         | 304                    |                 |                 | 0.9             |        |
|                                | Female                 | 140 / 149 (94%) | 145 / 155 (94%) |                 |        |
|                                | Male                   | 9 / 149 (6.0%)  | 10 / 155 (6.5%) |                 |        |
|                                | MD                     | 0               | 0               |                 |        |
| Ethnic origin                  | 304                    |                 |                 | 0.6             |        |
|                                | Asian                  | 1 / 149 (0.7%)  | 2 / 155 (1.3%)  |                 |        |
|                                | Black/African American | 1 / 149 (0.7%)  | 3 / 155 (1.9%)  |                 |        |
|                                | Caucasian/White        | 142 / 149 (95%) | 147 / 155 (95%) |                 |        |
|                                | Other                  | 5 / 149 (3.4%)  | 3 / 155 (1.9%)  |                 |        |
|                                | MD                     | 0               | 0               |                 |        |
| Obesity                        | 292                    | 14 / 140 (10%)  | 15 / 152 (9.9%) | >0.9            |        |
|                                | MD                     | 9               | 3               |                 |        |
| Cigarette.Smoking              | 282                    | 32 / 140 (23%)  | 27 / 142 (19%)  | 0.4             |        |
|                                | MD                     | 9               | 13              |                 |        |
| Duration.disease               | 304                    | 15 (9)          | 14 (10)         | 0.2             |        |
|                                | MD                     | 0               | 0               |                 |        |
| Physician global<br>assessment | 291                    | 17 (18)         | 20 (18)         | 0.026           |        |
|                                | MD                     | 0               | 13              |                 |        |
| Treatment                      |                        |                 |                 |                 |        |
|                                | Antimalarial           | 304             | 88 / 149 (59%)  | 119 / 155 (77%) | <0.001 |
|                                | MD                     | 0               | 0               |                 |        |
|                                | Immunosuppressors      | 304             | 40 / 149 (27%)  | 67 / 155 (43%)  | 0.003  |
|                                | MD                     | 0               | 0               |                 |        |
|                                | Steroids               | 304             | 68 / 149 (46%)  | 96 / 155 (62%)  | 0.004  |
|                                | MD                     | 0               | 0               |                 |        |
|                                | Anti TNF               | 304             | 0 / 149 (0%)    | 0 / 155 (0%)    |        |
|                                | MD                     | 0               | 0               |                 |        |
|                                | Tocilizumab            | 0               | NA (NA)         | NA (NA)         |        |
|                                | MD                     | 149             | 155             |                 |        |
|                                | Abatacept              | 0               | NA (NA)         | NA (NA)         |        |
|                                | MD                     | 149             | 155             |                 |        |

MD, Missing data

<sup>1</sup> Mean (SD); n / N (%)

<sup>2</sup> Wilcoxon rank sum test; Pearson's Chi-squared test; Fisher's exact test

| Characteristics of SSc patients | N      | South<br>N = 153 <sup>1</sup> | North<br>N = 117 <sup>1</sup> | p-value <sup>2</sup> |
|---------------------------------|--------|-------------------------------|-------------------------------|----------------------|
| Age                             | 270    | 59 (12)                       | 59 (13)                       | >0.9                 |
|                                 | MD     | 0                             | 0                             |                      |
| Gender                          | 270    |                               |                               | 0.6                  |
|                                 | Female | 138 / 153 (90%)               | 103 / 117 (88%)               |                      |
|                                 | Male   | 15 / 153 (9.8%)               | 14 / 117 (12%)                |                      |
|                                 | MD     | 0                             | 0                             |                      |

|                                         |     |                 |                 |        |
|-----------------------------------------|-----|-----------------|-----------------|--------|
| Ethnic origin                           | 270 |                 |                 | 0.2    |
| Asian                                   |     | 0 / 153 (0%)    | 3 / 117 (2.6%)  |        |
| Caucasian/White                         |     | 150 / 153 (98%) | 113 / 117 (97%) |        |
| Native Hawaiian/ Other Pacific Islander |     | 1 / 153 (0.7%)  | 0 / 117 (0%)    |        |
| Other                                   |     | 2 / 153 (1.3%)  | 1 / 117 (0.9%)  |        |
| MD                                      |     | 0               | 0               |        |
| Obesity                                 | 262 | 17 / 145 (12%)  | 9 / 117 (7.7%)  | 0.3    |
| MD                                      |     | 8               | 0               |        |
| Cigarette smoking                       | 253 | 15 / 142 (11%)  | 9 / 111 (8.1%)  | 0.5    |
| MD                                      |     | 11              | 6               |        |
| Duration disease                        | 270 | 13 (10)         | 10 (8)          | 0.004  |
| MD                                      |     | 0               | 0               |        |
| Physician global assessment             | 262 | 27 (16)         | 42 (22)         | <0.001 |
| MD                                      |     | 0               | 8               |        |
| Treatment                               |     |                 |                 |        |
| Antimalarial                            | 270 | 14 / 153 (9.2%) | 7 / 117 (6.0%)  | 0.3    |
| MD                                      |     | 0               | 0               |        |
| Immunosuppressors                       | 270 | 29 / 153 (19%)  | 31 / 117 (26%)  | 0.14   |
| MD                                      |     | 0               | 0               |        |
| Steroids                                | 270 | 38 / 153 (25%)  | 23 / 117 (20%)  | 0.3    |
| MD                                      |     | 0               | 0               |        |
| Anti TNF                                | 270 | 9 / 153 (5.9%)  | 0 / 117 (0%)    | 0.006  |
| MD                                      |     | 0               | 0               |        |
| Tocilizumab                             | 4   | 4 / 4 (100%)    | 0 / 0 (NA%)     |        |
| MD                                      |     | 149             | 117             |        |
| Abatacept                               | 3   | 3 / 3 (100%)    | 0 / 0 (NA%)     |        |
| MD                                      |     | 150             | 117             |        |

MD, Missing data

<sup>1</sup> Mean (SD); n / N (%)

<sup>2</sup> Wilcoxon rank sum test; Pearson's Chi-squared test; Fisher's exact test

| Characteristics of RA patients | N   | South<br>N = 110 <sup>1</sup> | North<br>N = 174 <sup>1</sup> | p-value <sup>2</sup> |
|--------------------------------|-----|-------------------------------|-------------------------------|----------------------|
| Age                            | 284 | 57 (12)                       | 59 (13)                       | 0.2                  |
| MD                             |     | 0                             | 0                             |                      |
| Gender                         | 284 |                               |                               | 0.3                  |
| Female                         |     | 89 / 110 (81%)                | 132 / 174 (76%)               |                      |
| Male                           |     | 21 / 110 (19%)                | 42 / 174 (24%)                |                      |
| MD                             |     | 0                             | 0                             |                      |
| Ethnic origin                  | 284 |                               |                               | >0.9                 |
| Black/African American         |     | 0 / 110 (0%)                  | 1 / 174 (0.6%)                |                      |
| Caucasian/White                |     | 109 / 110 (99%)               | 172 / 174 (99%)               |                      |
| Other                          |     | 1 / 110 (0.9%)                | 1 / 174 (0.6%)                |                      |

|                                |    |     |                |                 |        |
|--------------------------------|----|-----|----------------|-----------------|--------|
|                                | MD |     | 0              | 0               |        |
| Obesity                        |    | 277 | 18 / 103 (17%) | 29 / 174 (17%)  | 0.9    |
|                                | MD |     | 7              | 0               |        |
| Cigarette.Smoking              |    | 261 | 18 / 96 (19%)  | 45 / 165 (27%)  | 0.12   |
|                                | MD |     | 14             | 9               |        |
| Duration.disease               |    | 284 | 12 (9)         | 14 (11)         | 0.071  |
|                                | MD |     | 0              | 0               |        |
| Physician global<br>assessment |    | 283 | 24 (21)        | 19 (20)         | 0.021  |
|                                | MD |     | 0              | 1               |        |
| Treatment                      |    |     |                |                 |        |
| Antimalarial                   |    | 284 | 31 / 110 (28%) | 15 / 174 (8.6%) | <0.001 |
|                                | MD |     | 0              | 0               |        |
| Immunosuppressors              |    | 284 | 83 / 110 (75%) | 122 / 174 (70%) | 0.3    |
|                                | MD |     | 0              | 0               |        |
| Steroids                       |    | 284 | 59 / 110 (54%) | 71 / 174 (41%)  | 0.034  |
|                                | MD |     | 0              | 0               |        |
| Anti TNF                       |    | 284 | 38 / 110 (35%) | 92 / 174 (53%)  | 0.003  |
|                                | MD |     | 0              | 0               |        |
| Tocilizumab                    |    | 35  | 8 / 8 (100%)   | 27 / 27 (100%)  |        |
|                                | MD |     | 102            | 147             |        |
| Abatacept                      |    | 24  | 8 / 8 (100%)   | 16 / 16 (100%)  |        |
|                                | MD |     | 102            | 158             |        |

MD, Missing data

<sup>1</sup> Mean (SD); n / N (%)

<sup>2</sup> Wilcoxon rank sum test; Pearson's Chi-squared test; Fisher's exact test
